# Supplementary material for: The Evolution of Blood Cell Phenotypes, Intracellular and Plasma Cytokines and Morphological Changes in Critically Ill COVID-19 Patients
Source: MDPI journal article supplement (doi:10.3390/biomedicines10050934), 2022-04-19
Supplement: s1 [file s1]

**Table S1.** Flow cytometry markers.

| <b>Antibody</b> | <b>Fluorochrome</b> | <b>Clone</b> | <b>Isotype</b> |
|-----------------|---------------------|--------------|----------------|
| CD8             | FITC                | BW135/80     | IgG2gk         |
| CD33            | FITC                | AC104.3E3    | IgG1λ          |
| CD45            | FITC                | 5B1          | IgG2ak         |
| CD59            | FITC                | REA496       | IgG1           |
| CD127           | FITC                | MB15-18C9    | IgG2ak         |
| IL-6            | FITC                | REA1037      | IgG1           |
| IL-8            | FITC                | REA731       | IgG1           |
| CD4             | PE                  | M-T466       | IgG1κ          |
| CD25            | PE                  | 4E3          | IgG2bκ         |
| IL-10           | PE                  | REA842       | IgG1           |
| HLA DR          | PE                  | AC122        | IgG2ak         |
| CD14            | PerCP               | TÜK4         | IgG2ak         |
| CD45            | PerCP               | 5B1          | IgG2ak         |
| CD2             | APC                 | LT1          | IgG2ak         |
| CD19            | APC                 | REA675       | IgG1           |
| CD55            | APC                 | JS11         | IgG1k          |
| CD158d          | APC                 | REA768       | IgG1λ          |
| CD203c          | APC                 | FR3-16A11    | IgG1κ          |
| IL1R2           | APC                 | REA689       | IgG1           |
| TNFα            | APC                 | REA656       | IgG1           |

Abbreviations: Human Leukocyte Antigen (HLA), Interleukin (IL), Interleukin 1 receptor 2 (IL1R2), Tumor Necrosis Factor alfa (TNFα), Fluorescein Isothiocyanate (FITC), Phycoerythrin (PE), Peridinin-chlorophyllprotein Complex (PerCP), Allophycocyanin Conjugate (APC).
