# Supplementary material for: The Evolution of Blood Cell Phenotypes, Intracellular and Plasma Cytokines and Morphological Changes in Critically Ill COVID-19 Patients
Source: MDPI journal article supplement (doi:10.3390/biomedicines10050934), 2022-04-19
Supplement: s1 [file s1]

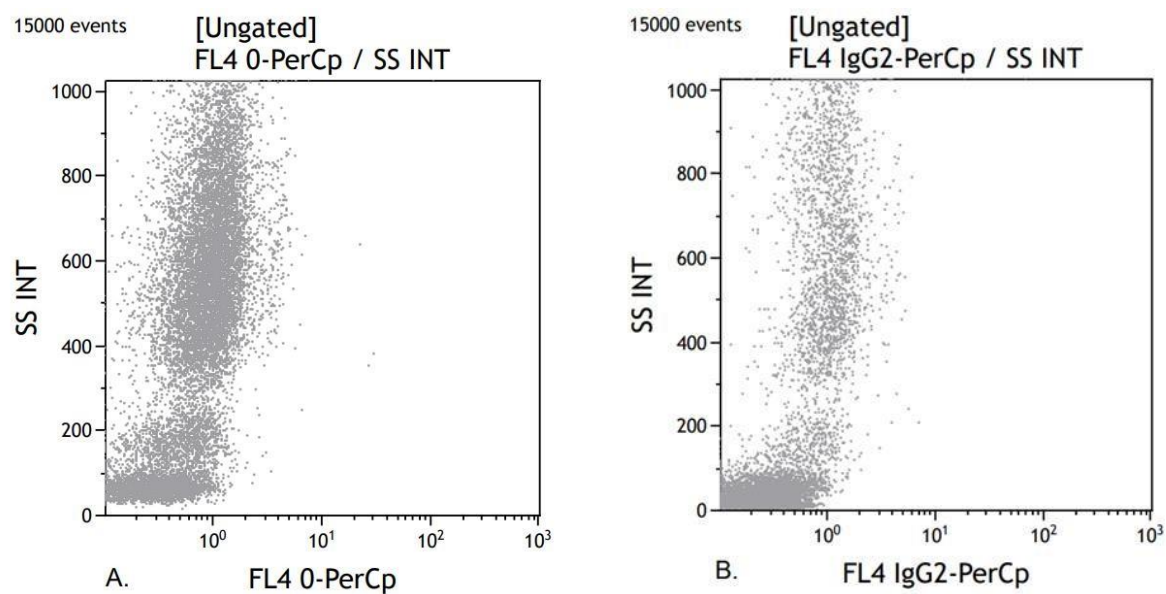

**Figure S2.** Negative controls for Flowcytometry (FCM) analysis. **(A)** FCM scatterplot of an unstained sample. **(B)** FCM scatterplot for the isotypic control of IgG2.
