# Supplementary figures and images for: The Evolution of Blood Cell Phenotypes, Intracellular and Plasma Cytokines and Morphological Changes in Critically Ill COVID-19 Patients
Source: MDPI journal article supplement (doi:10.3390/biomedicines10050934), 2022-04-19

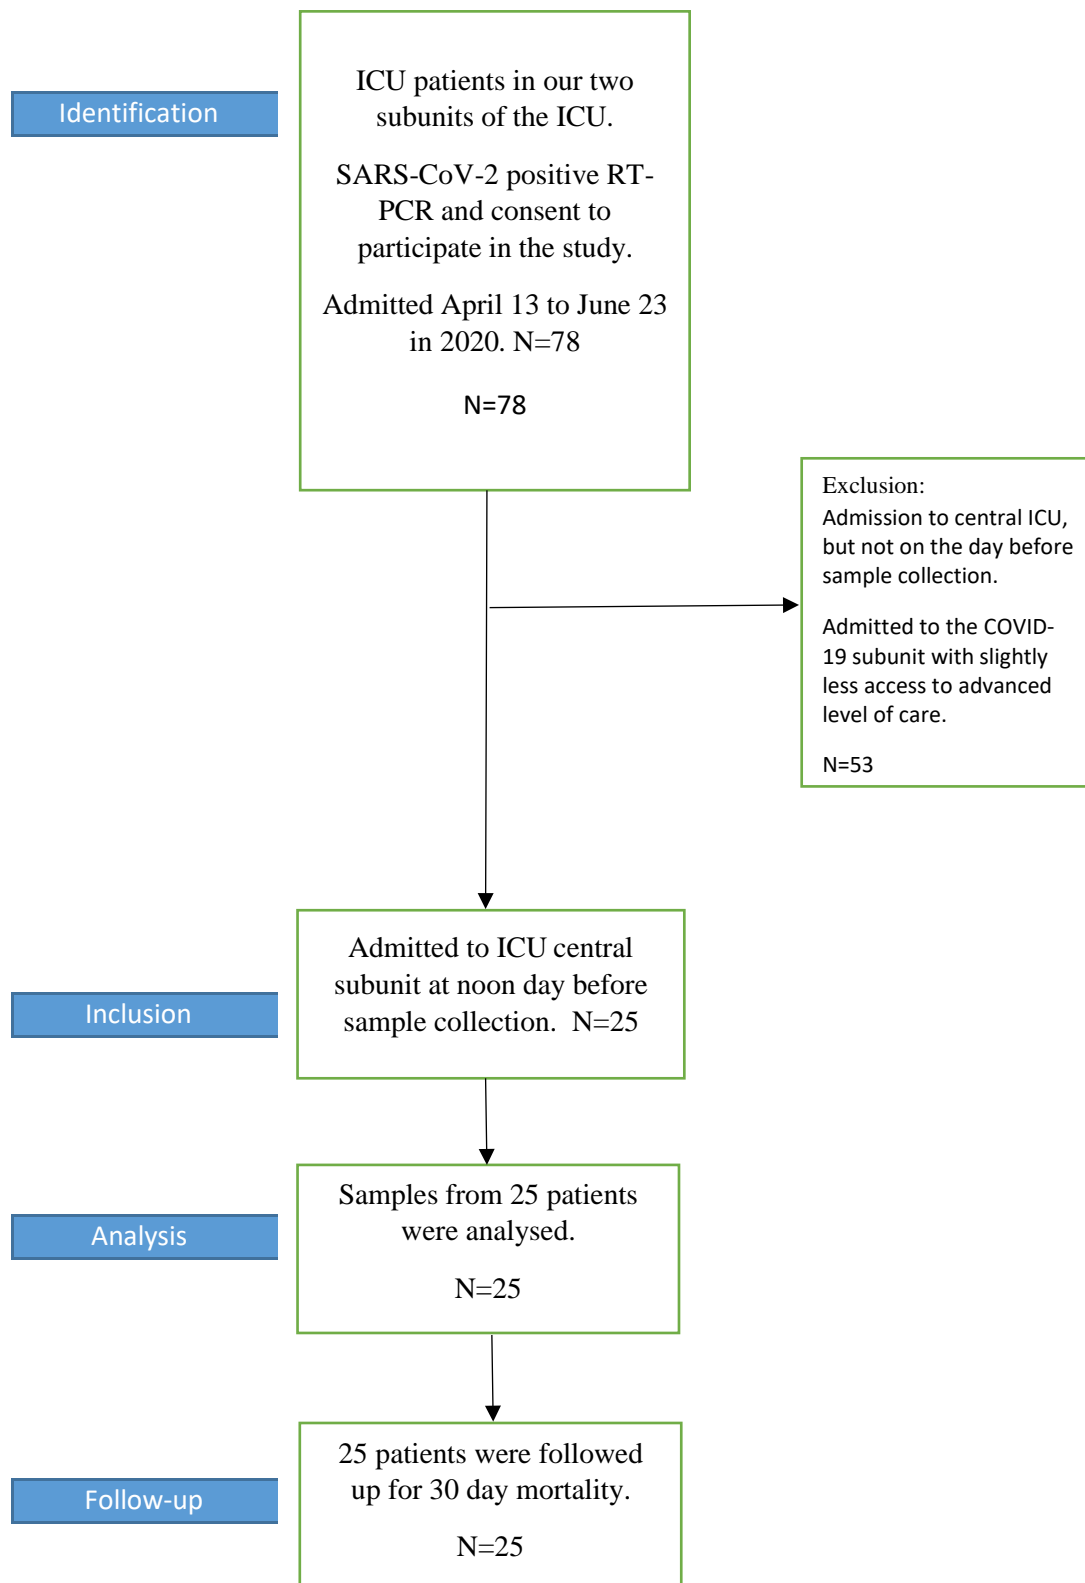

**Figure S1.** Study Flow Diagram.

Supplement: s1 [file s1]
